# Supplementary material for: Distorted octahedral cobalt(ii)–acylpyrazolone complex with a tunable lattice-strain structure – an efficient electrocatalyst for overall water splitting
Source: Royal Society of Chemistry journal article supplement (doi:10.1039/d2cy02068h), 2023-01-01
Supplement: d2cy02068h1.pdf [file d2cy02068h1.pdf]

## Electronic Supplementary Information

### **Distorted octahedral Cobalt(II)-Acylpyrazolone complex with tunable lattice-strain structure - An efficient electrocatalyst for overall water splitting**

Claudelle Sybilline Anensong Djadock,<sup>\*ab</sup> Singaram Vengatesan,<sup>\*ac</sup> Alain Charly Tagne Kuate,  
<sup>bd</sup> Jean Ngoune,<sup>\*bd</sup> Subbiah Ravichandran,<sup>ac</sup> Subramanyan Vasudevan,<sup>ac</sup>

<sup>a</sup> Electro-Inorganic Chemicals Division, CSIR-Central Electrochemical Research Institute, Karaikudi 630003, India.

<sup>b</sup> Department of Chemistry, University of Dschang, Dschang, Cameroon.

<sup>c</sup> Academy of Scientific & Innovative Research (AcSIR), Ghaziabad-201002, India

<sup>d</sup> Department of Chemistry, Rutgers University-Newark, 73 Warren Street, Newark, NJ 07102, USA.

### **Synthesis of acylpyrazolone Schiff base ligands**

**Synthesis of HPMAP:** 1-phenyl-3-methylpyrazolone (0.1 mol, 17.5g) was dissolved in 90-100 mL of DMF in a RB flash equipped with a stirrer and condenser. Calcium hydroxide (0.2 mol, 14.81 g) was added to the yellow solution after 2-5 min and stirring for 2h. Then, acetyl chloride (0.1 mol, 7.85g) was added to the resultant yellow pale mixture and refluxed for 2-3 hours and the reaction was followed by TLC. The formed calcium complex was decomposed by pouring the mixture into HCl solution (2N, 200mL) which gave brown colorless solid. The brown solid after filtration was washed several times with distilled water and dried in oven at 80°C. The obtained product was soluble in chloroform, ethanol, acetonitrile and insoluble in n-hexane. Yield= 56.01%: Yield: (1.1g, 56%); mp: 72-75°C

**Synthesis of HPMBP:** HPMBP was prepared analogously from 1-phenyl-3-methylpyrazolone (0.1 mol, 17.5g), Calcium hydroxide (0.2 mol, 14.81 g) and benzoyl chloride (0.1 mol, 14.05g) using the same procedure as followed for HPMAP synthesis. Yield: (17.55g, 80%); Mp: 85-88°C.

**Synthesis of HPMTP:** HPMTP was prepared analogously from 1-phenyl-3-methylpyrazolone(0.1 mol, 17.5g), Calcium hydroxide (0.2 mol, 14.81 g) and toluoyl chloride(0.1 mol, 14.49g) using the same procedure procedure as followed for HPMAP synthesis. Yield: (19.85g, 78%); mp: 82-85°C.

## NMR spectrum of acylpyrazolone ligands

### 1-phenyl-3-methyl-4-benzoylpyrazolone (HPMBP)

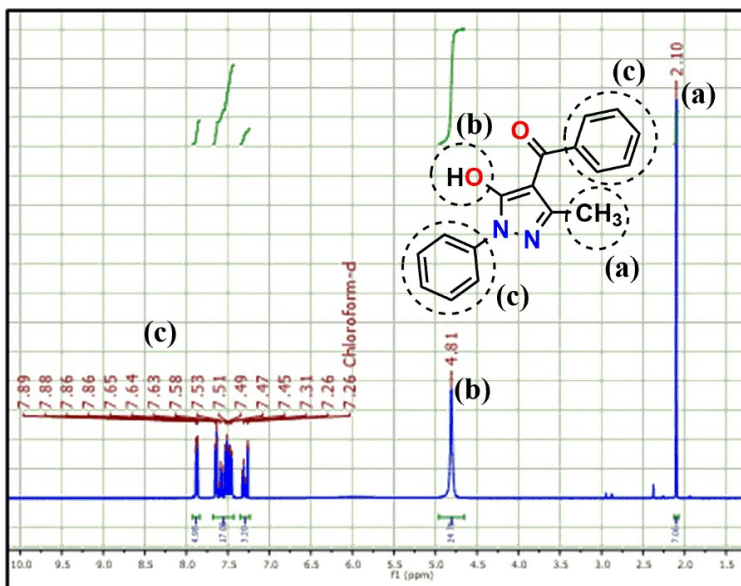

Fig. S1 <sup>1</sup>H NMR Spectrum of HPMBP

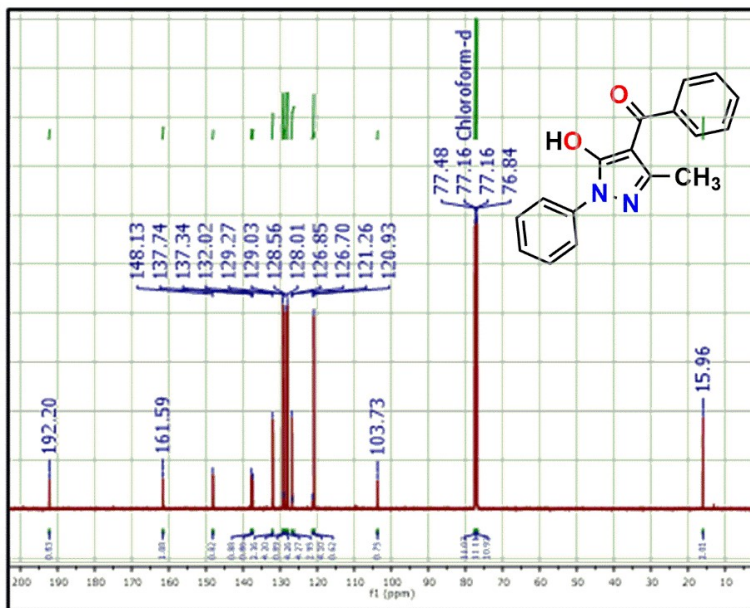

Fig. S2. <sup>13</sup>C NMR Spectrum of HPMBP

<sup>1</sup>H NMR (CDCl<sub>3</sub>): Rf=0.57 (CH<sub>2</sub>Cl<sub>2</sub>: MeOH 9:1), δ= 2.10s (C<sub>3</sub>-CH<sub>3</sub>), 4.84s(O-H) 7.91d, 7.89-7.86dd, 7.66-7.63dd, 7.60-7.57m, 7.53-7.45m 7.33-7.29t (10H, H-ar. of HPMBP).

<sup>13</sup>CNMR (CDCl<sub>3</sub>): δ=15.96s (C<sub>3</sub>-CH<sub>3</sub>), 103.73s(C=C-OH), 120.93s, 121.26s, 126.85, 128.01s, 128.56, 129.27s, 132.08, 137.34s, 137.74s (C-ar of HPMBP), 148.13s (C=N), 161.59s (C-OH),

192.20(C=O).<sup>1-3</sup>

### 1-phenyl-3-methyl-4-toluoylpyrazolone (HPMTP)

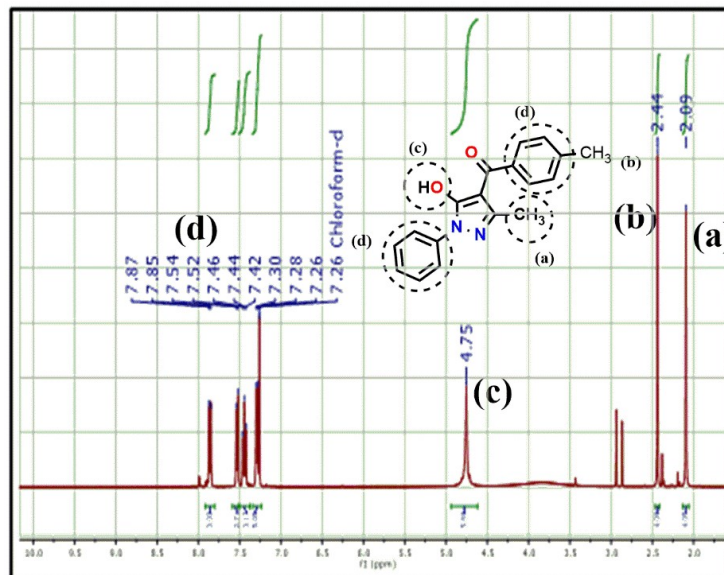

Fig. S3 <sup>1</sup>H NMR Spectrum of HPMTP

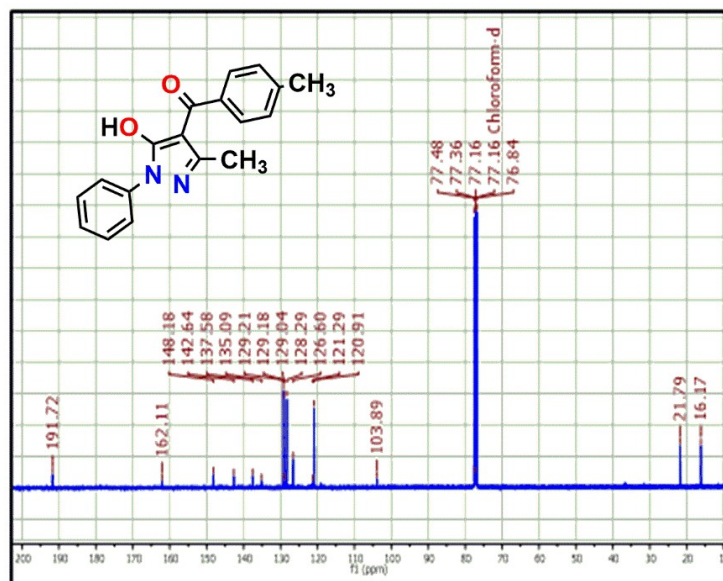

Fig. S4 <sup>13</sup>C NMR Spectrum of HPMTP

<sup>1</sup>H NMR (CDCl<sub>3</sub>): Rf=0.78 (CH<sub>2</sub>Cl<sub>2</sub>:MeOH 9:1), δ=2.09s (C3-CH<sub>3</sub>), δ=2.44s (C4-CH<sub>3</sub>), 4.75s(O-H), 7.91-7.89d, 7.84-7.82d, 7.46-7.44d, 7.40-7.36t, 7.24-7.22d (9H, H-ar of HPMTP).

<sup>13</sup>CNMR (CDCl<sub>3</sub>): δ=16.17s (C3-CH<sub>3</sub>), δ= 21.79s (C4-CH<sub>3</sub>), 103.89s (C=C-OH),120.91s, 121.29s, 126.60s, 128.29s, 129.04s, 129.18s, 135.09s, 137.58s, 142.64s (C-ar of HPMTP), 148.18s

(C3), 162.11s (C-OH), 191.72(C=O).<sup>4,5</sup>

### 1-phenyl-3-methyl-4-acetylpyrazolone (HPMAP)

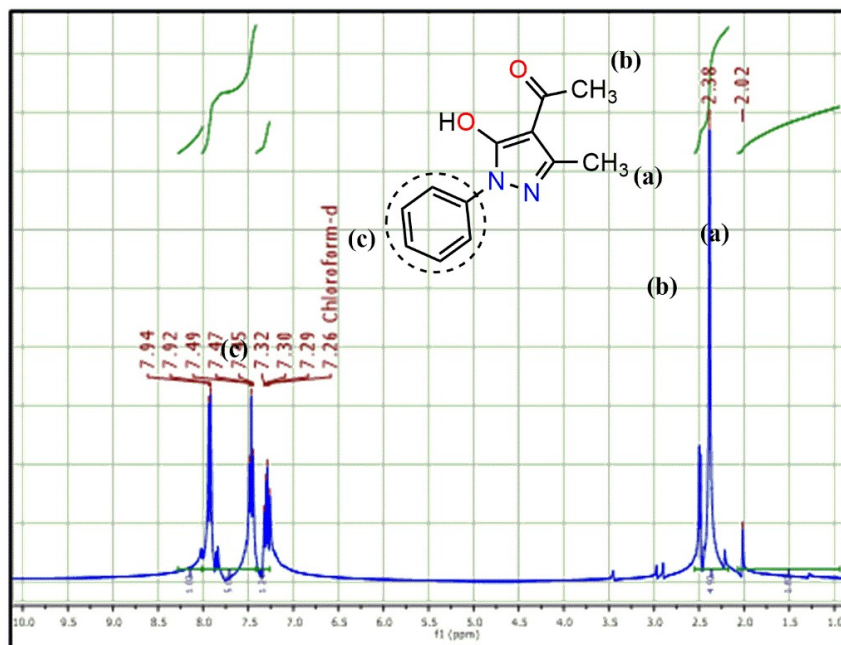

Fig. S5 <sup>1</sup>H NMR Spectrum of HPMAP

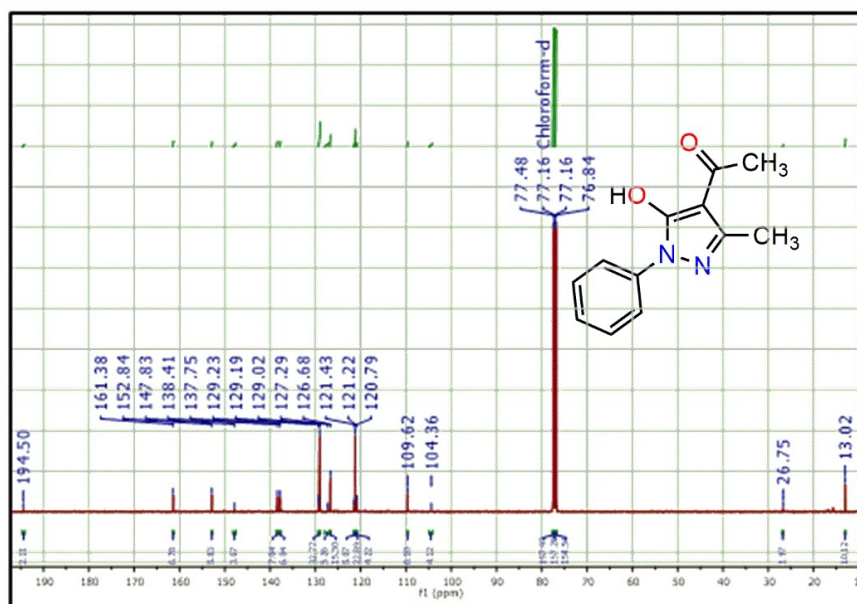

Fig. S6 <sup>13</sup>C NMR Spectrum of HPMAP

### FT-IR spectra of acylpyrazolone ligands

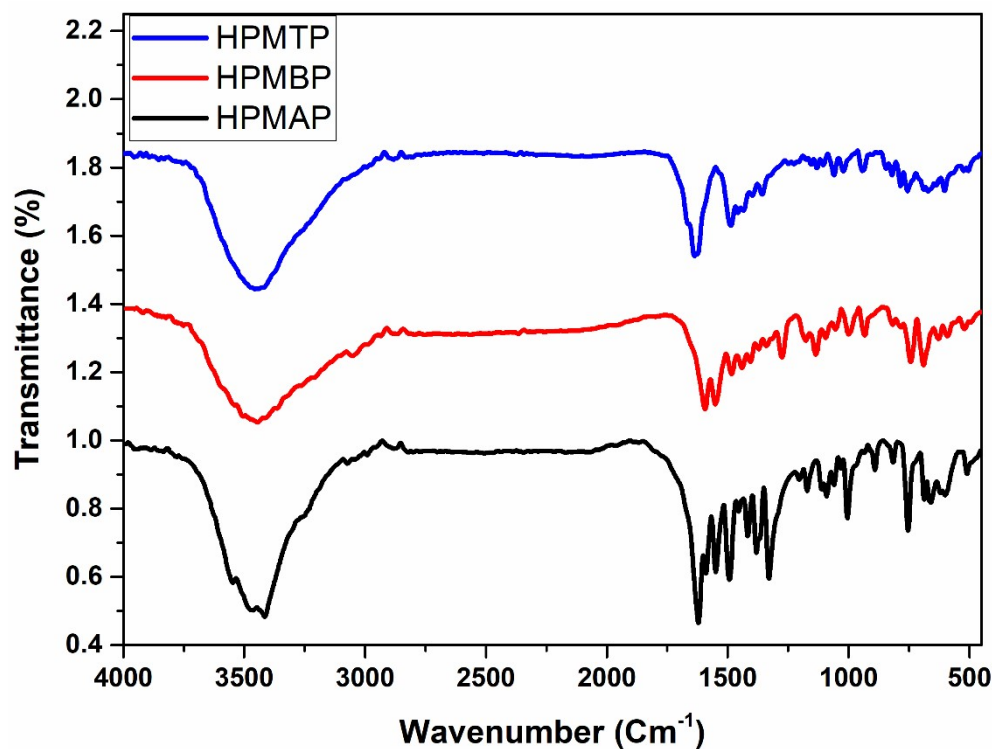

Fig. S7 FT-IR spectra of acylpyrazolone ligands: HPMAp, HPMBP and HPMTp

Table. S1 Infrared vibrational frequencies ( $\text{cm}^{-1}$ ) of the acylpyrazolone ligand derivatives and their peak assignments

| HPMAp              | HPMBP              | HPMTp              | Assignments                                          |
|--------------------|--------------------|--------------------|------------------------------------------------------|
| 3415.16 br         | 3452.95br          | 3476.30br          | $\nu$ -OH enol form of ligand                        |
| 1621.17br          | 1602.95br          | 1634.24br          | $\nu$ C=O                                            |
| 1549.64s           | 1580.43s           | 1555.83s           | $\nu$ C=N of Pyrazole ring stretching                |
| 1493.02m           | 1492.57m           | 1490.59w           | $\nu$ C=C of phenyl and pyrazole                     |
| 1381.46m           | 1349.53m           | 1212.42            | $\nu$ as C-N of pyrazole ring                        |
| 1059.99s           | 1140.79s           | 1167.31s           | $\nu$ as C-O                                         |
| 1030.92m, 1004.49m | 1033.49m, 1008.73m | 1062.29m, 1025-40m | C-H in plane deformation and CH <sub>3</sub> rocking |
| 890.44br, 753.69br | 791br, 791br       | 753.73br 943.36br, | Chelating deformation                                |

|                                                                                                  |         |        |                          |
|--------------------------------------------------------------------------------------------------|---------|--------|--------------------------|
| 509.91                                                                                           | 637.13, | 688.36 | Chelating ring vibration |
| Legend = br = Broad, S = strong, W = weak, vas = Asymmetric stretching, vs = Symetric stretching |         |        |                          |

**Table. S2** CHNS analysis data and physical properties of the synthesized acylpyrazolone ligands and their Cobalt complexes

| Compounds,<br>empirical formula                                                                                              | Calculated<br>(Experimental) (%) |                  |                | Melting<br>Point °C                    |
|------------------------------------------------------------------------------------------------------------------------------|----------------------------------|------------------|----------------|----------------------------------------|
|                                                                                                                              | C                                | N                | H              |                                        |
| HPMBP<br>C <sub>17</sub> H <sub>14</sub> N <sub>2</sub> O <sub>2</sub>                                                       | 73.29<br>(71.90)                 | 10.06<br>(10.3)  | 5.03<br>(6.14) | 85-88                                  |
| HPMTP<br>C <sub>18</sub> H <sub>16</sub> N <sub>2</sub> O <sub>2</sub>                                                       | 73.95<br>(72.30)                 | 9.58<br>(8.84)   | 5.52<br>(5.66) | 82-85                                  |
| HPMAP<br>C <sub>12</sub> H <sub>12</sub> N <sub>2</sub> O <sub>2</sub>                                                       | 66.59<br>(67.75)                 | 12.94<br>(14.73) | 5.54<br>(4.80) | 72-75                                  |
| [(OH <sub>2</sub> ) <sub>2</sub> (PMBP) <sub>2</sub> Co]<br>C <sub>34</sub> H <sub>30</sub> N <sub>4</sub> O <sub>6</sub> Co | 62.67<br>(60.16)                 | 8.60<br>(8.60)   | 4.91<br>(5.05) | Carbonized<br>between<br>130-140<br>°C |
| [(OH <sub>2</sub> ) <sub>2</sub> (PMTP) <sub>2</sub> Co]<br>C <sub>36</sub> H <sub>34</sub> N <sub>4</sub> O <sub>6</sub> Co | 63.62<br>(62.89)                 | 8.24<br>(8.14)   | 5.30<br>(5.74) |                                        |

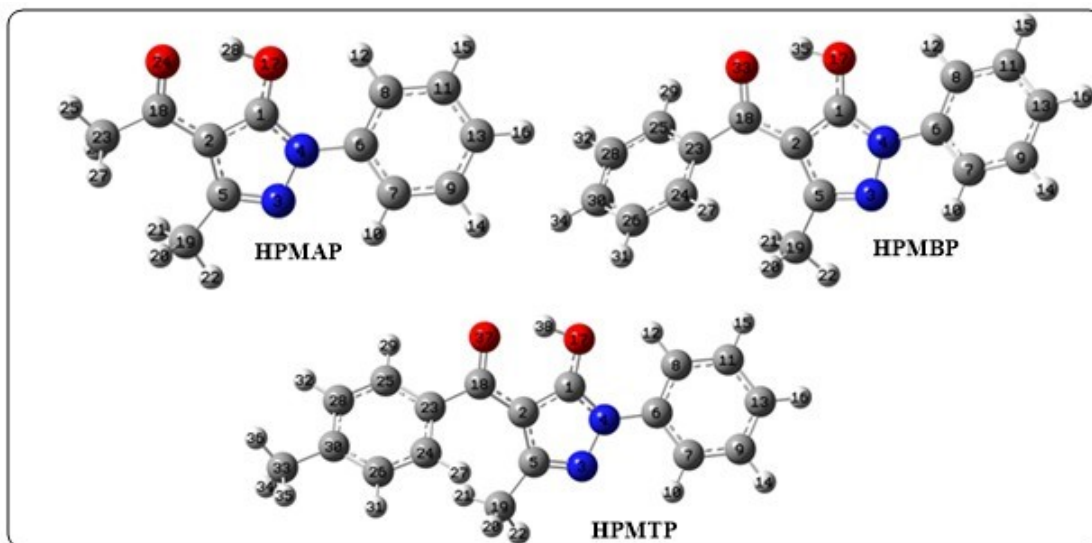

**Fig. S8** Optimized structures of HPMAP, HPMBP and HPMTMP (B3LYP/6-31G(d, p) basis set.)

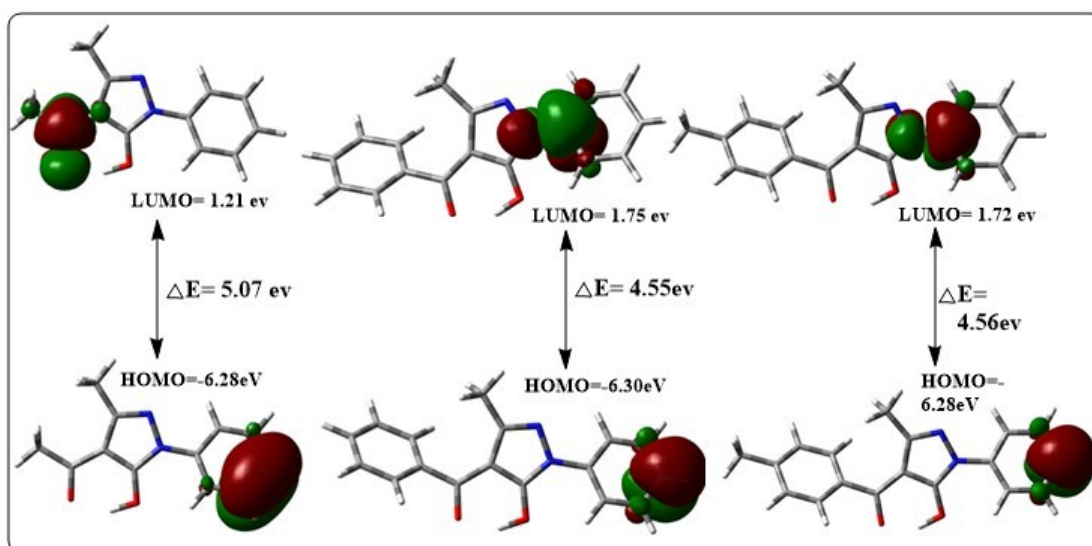

**Fig. S9** HOMO and LUMO distribution of HPMAP, HPMBP and HPMTMP



**Table. S3** Frontier orbital energies, Ionization potential, electron Affinity, Softness and Chemical hardness of HPMAP, HPMBP and HPMTTP ligands

| Ligands | E(HOMO)<br>(eV) | E(LUMO)<br>(eV) | $\Delta E$<br>(eV) | I<br>(eV) | A<br>(eV) | $\eta$<br>(eV) | S<br>(eV) |
|---------|-----------------|-----------------|--------------------|-----------|-----------|----------------|-----------|
| HPMAP   | -6.287          | -1.216          | 5.071              | 6.287     | 1.216     | 2.535          | 0.395     |
| HPMBP   | -6.306          | -1.758          | 4.558              | 6.306     | 1.758     | 2.274          | 0.439     |
| HPMTTP  | -6.289          | -1.728          | 4.561              | 6.289     | 1.728     | 2.280          | 0.438     |

**Table. S4** NBOs and hybridization states of HPMAP, HPMBP and HPMTTP obtained at B3LYP/6-31G (d,p) level

| HPMAP                 |                                                      | HPMBP                 |                                                      | HPMTTP                |                                                      |
|-----------------------|------------------------------------------------------|-----------------------|------------------------------------------------------|-----------------------|------------------------------------------------------|
| Donors NBO            | Hybrid                                               | Donors NBO            | Hybrid                                               | Donors NBO            | Hybrid                                               |
| $\delta$ (1) C1- O17  | sp <sup>2.40</sup> (C1)<br>sp <sup>1.83</sup> (O17)  | $\delta$ (1) C1-O17   | sp <sup>2.39</sup> (C1)<br>sp <sup>1.82</sup> (O17)  | $\delta$ (1) C1- O17  | sp <sup>2.39</sup> (C1)<br>sp <sup>1.82</sup> (O17)  |
| $\delta$ (1) C18 -O24 | sp <sup>2.47</sup> (C18)<br>sp <sup>1.46</sup> (O24) | $\delta$ (1) C18 -O33 | sp <sup>2.55</sup> (C18)<br>sp <sup>1.53</sup> (O33) | $\delta$ (1) C18 -O37 | sp <sup>2.55</sup> (C18)<br>sp <sup>1.53</sup> (O37) |
| LP (1) O17            | sp <sup>1.38</sup>                                   | LP (1) O17            | sp <sup>1.39</sup>                                   | LP (1) O17            | sp <sup>1.39</sup>                                   |
| LP (1) O24            | Sp <sup>0.84</sup>                                   | LP (1) O33            | sp <sup>0.90</sup>                                   | LP (1) O37            | sp <sup>0.91</sup>                                   |
| -----                 | -----                                                | LP (1) C13            | p <sup>1</sup>                                       | LP (1) C13            | p <sup>1</sup>                                       |

**Table. S5** Infrared vibrational frequencies ( $\text{Cm}^{-1}$ ) of the acylpyrazolone ligands and its cobalt complexes, and their assignments

| HPMBP     | HPMTP     | Complex 1        | Complex 2        | Assignments                                     |
|-----------|-----------|------------------|------------------|-------------------------------------------------|
| -----     | -----     | 3450-3700        | 3450-3700        | $\sqrt{\text{-OH}}$ of water                    |
| 1602.95br | 1634.24br | 1611.25 br       | 1609.89 br       | $\sqrt{\text{C=O}}$                             |
| 1580.43s  | 1555.83s  | 1484.45-1300m    | 1487.31-1300 w   | $\sqrt{\text{C=N}}$ of Pyrazole ring stretching |
| 1492.57m  | 1490.59w  |                  |                  | $\sqrt{\text{C=C}}$ of phenyl and pyrazole      |
| 1349.53m  | 1212.42   |                  |                  | $\sqrt{\text{as C-N}}$ of pyrazole ring         |
| 1140.79s  | 1167.31s  | 1021.32-1059.61s | 1030.69-1062.14s | $\sqrt{\text{as C-O}}$                          |
|           | -----     | 552.26 - 438.01w | 527.43-441.61w   | Co-O                                            |
|           |           | 839.36 w         | 842.20 w         | coordinated water molecule                      |

**Table. S6** UV-visible absorption wavelengths (nm) of acylpyrazolone ligands derivatives and its cobalt complexes, and their assignments

| HPMBP | HPMTP | Complex 1 | Complex 2 | Assignments             |
|-------|-------|-----------|-----------|-------------------------|
| 285   | 293   | 280       | 285       | $\pi \rightarrow \pi^*$ |
| 346   | 368   | 340       | 347       | $n \rightarrow \pi^*$   |

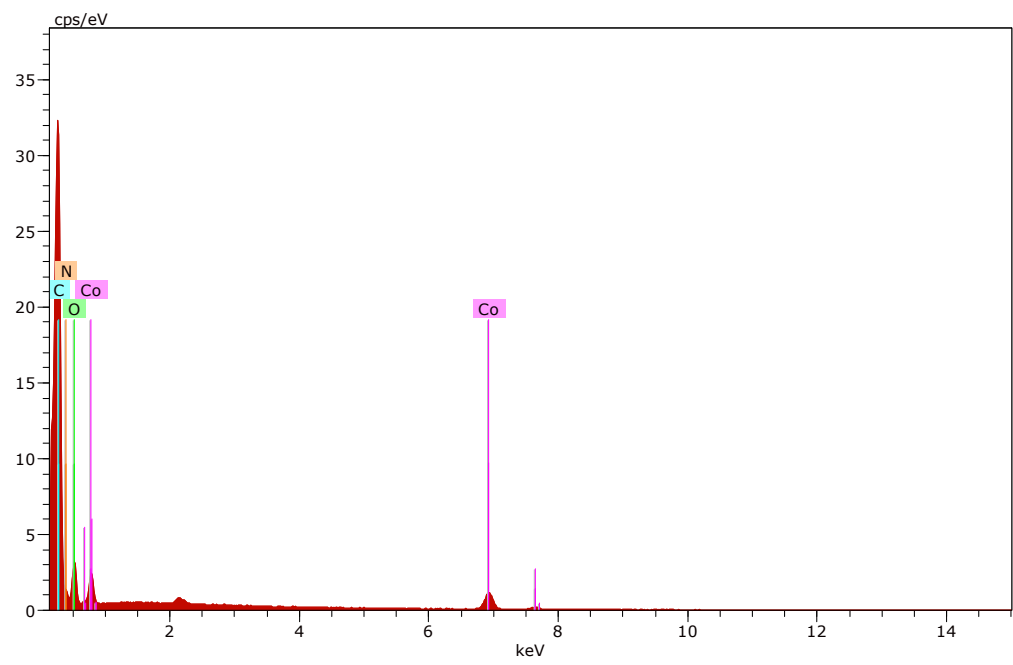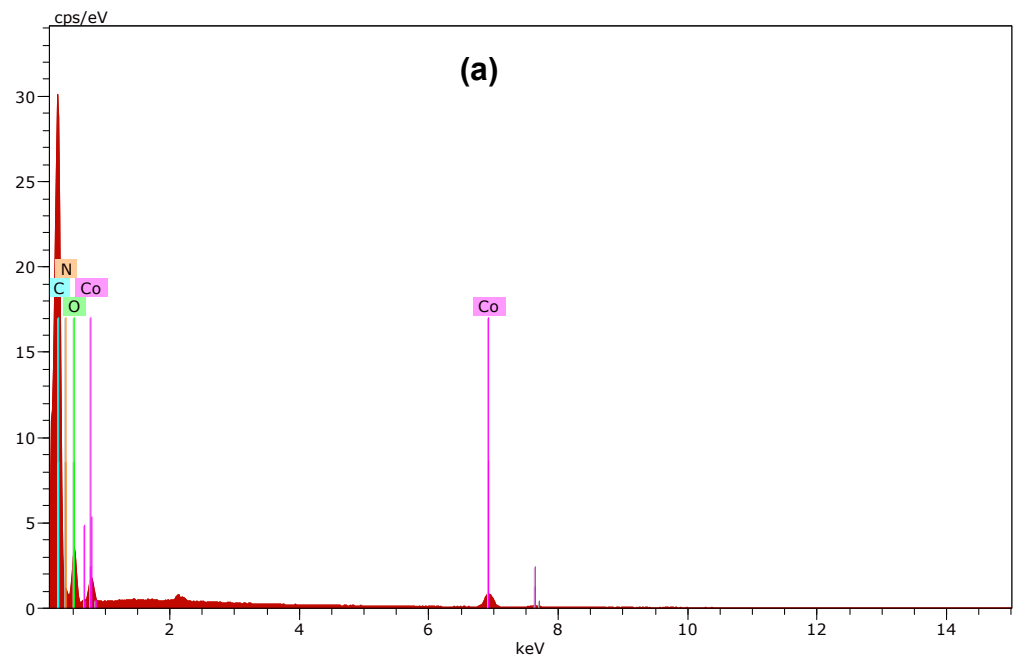

(b)

Fig. S10 EDAX spectra of (a) complex (1) and (b) complex (2)

**Table. S7** XPS Binding Energies Data, FWHM of the Co 2p<sub>3/2</sub>, Co 2p<sub>1/2</sub> and their satellite of Co-complexes and Co(II) chloride hexahydrate

|                                | Cobalt chloride hexahydrate |           | Complex (1)           |           | Complex (2)           |           |
|--------------------------------|-----------------------------|-----------|-----------------------|-----------|-----------------------|-----------|
|                                | B.E (eV)                    | FWHM (eV) | B.E (eV)              | FWHM (eV) | B.E (eV)              | FWHM (eV) |
| Co2p <sub>3/2</sub>            | 780.65                      | 3.07      | 778.74                | 2.93      | 778.47                | 2.58      |
| Co 2p <sub>3/2</sub> satellite | 785.79                      | 6.52      | 782.72                | 6.58      | 782.20                | 6.56      |
| Co 2p <sub>1/2</sub> satellite | 802.57                      | 5.05      | 798.91                | 5.51      | 798.29                | 6.91      |
| O 1s                           | 531.28                      | 2.88      | 533.98                | 1.67      | 533.80                | 1.58      |
|                                |                             |           | 529.43                | 2.54      | 529.38                | 1.78      |
|                                |                             |           | 529.34                | 1.18      | 529.07                | 1.11      |
|                                |                             |           | 528.85                | 1.28      | 528.69                | 1.21      |
| N 1s                           | -----                       | -----     | 398.15                | 1.21      | 398.18                | 1.14      |
|                                |                             |           | 396.68                | 1.67      | 396.72                | 1.58      |
| C 1s                           | -----<br>-----              | -----     | 289.21                | 1.58      | 289.00                | 1.52      |
|                                |                             |           | 284.42                | 1.46      | 284.50                | 1.02      |
|                                |                             |           | 282.66                | 1.31      | 282.51                | 1.43      |
|                                |                             |           | 282.11                | 1.02      | 282.05                | 0.98      |
| Spin-orbital splitting         | $\Delta E_{1a}= 15.96$      |           | $\Delta E_{1b}=15.79$ |           | $\Delta E_{1c}=15.94$ |           |
|                                | $\Delta E_{2a}= 16.78$      |           | $\Delta E_{2b}=16.19$ |           | $\Delta E_{2c}=16.09$ |           |

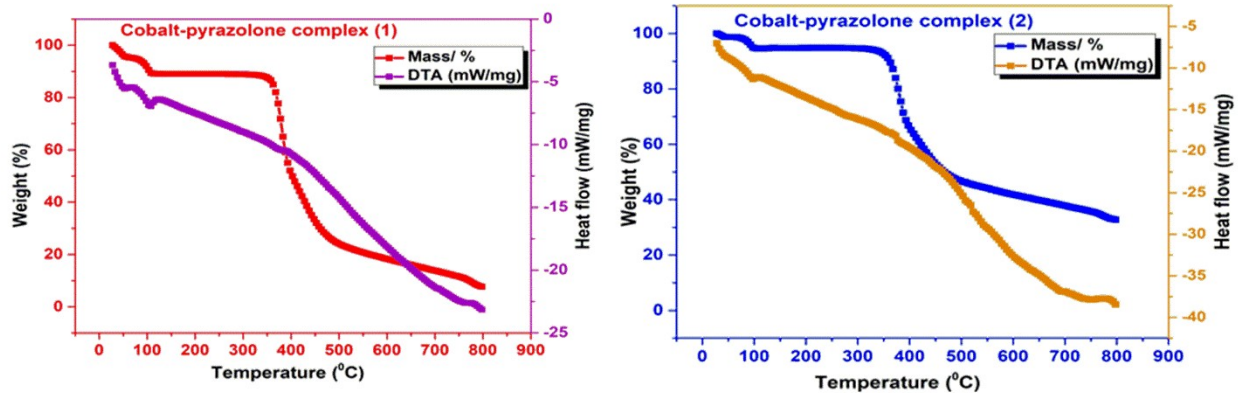

Fig. S11 TGA/DTA curves of the cobalt-acylpyrazolone complexes under N<sub>2</sub> atmosphere

**Table. S8** Comparison of cobalt complexes towards OER with literature reported  
Cobalt and transition metal based electrocatalysts in 1M KOH

| Electrocatalysts                                                                                                                        | Current density (mA/cm <sup>2</sup> ) | Overpotential (mV) | Tafel slope (mV/dec) | Reference           |
|-----------------------------------------------------------------------------------------------------------------------------------------|---------------------------------------|--------------------|----------------------|---------------------|
| CoSe <sub>4</sub>                                                                                                                       | 10                                    | 320                | 61.6                 | 6                   |
| [Co(L1)]<br>H <sub>2</sub> L1: N,N0- bis(salicylidene)-4-chloro-1,2-phenyldiamine                                                       | 10                                    | 316                | 75                   | 7                   |
| [Co(L2)]N,N0<br>H <sub>2</sub> L <sub>2</sub> : N,N0-bis(salicylidene)-4-bromo-1,2-phenyldiamine                                        |                                       | 247                | 50                   |                     |
| CoOOH                                                                                                                                   | 0.1                                   | 385                | 94.6                 | 8                   |
| ([Co1.5(tib)(dcpna)]·6H <sub>2</sub> O)<br>1,3,5-tris(1-imidazolyl)-benzene (tib), 5-(30 ,50 -dicarboxylphenyl)nicotinic acid (H3dcpna) | 10                                    | 360                | 89                   | 8                   |
| Co <sub>3</sub> O <sub>4</sub> /NRGO (N-doped reduced graphene oxide (NRGO))                                                            | 10                                    | 420                | 83                   | 9                   |
| [CoIII(LN <sub>2</sub> O <sub>3</sub> )H <sub>2</sub> O]                                                                                | 10                                    | 500                | No data              | 10                  |
| CoP                                                                                                                                     |                                       | 400                | 57                   | 11                  |
| [CoL <sub>2</sub> )<br>(H <sub>2</sub> L = 4-chloro-1,2-bis [2-hydroxy-5-(phenylazo)benzylideneamino]benzene                            | 10                                    | 360                | No data              | 12                  |
| [CoL <sub>2</sub> )<br>L2:Bis[Salicylydene]-1,2-Iminophenylenediamine                                                                   | 2                                     | 140                | 84                   | 12                  |
| [Co(L) (CH OH) ]<br>L2: Soduim (E)-4-(2-hydroxylnaphtalene-1-yl)diazinyl benzenesulfonate                                               | 0.5                                   | 520                | No data              | 12                  |
|                                                                                                                                         | 5.0                                   | 720                |                      |                     |
| NiCo LDHs/GF                                                                                                                            | 20                                    | 249                | 108.02               | 13                  |
| 3D-Ni-MOF/NF with 4,4'-biphenyl dicarboxylic acid                                                                                       | 20                                    | 350                |                      | 14                  |
| <b>Complex (1)</b>                                                                                                                      | <b>10</b>                             | <b>140</b>         | <b>50</b>            | <b>Present work</b> |
| <b>Complex (2)</b>                                                                                                                      | <b>10</b>                             | <b>320</b>         | <b>90</b>            |                     |

**Table. S9** Comparison of EIS data of cobalt complexes towards OER with literature reported Cobalt based electrocatalysts

| <b>Compounds</b>                                     | <b>Rs (ohm)</b> | <b>Rct (ohm)</b> | <b>Cdl</b>     | <b>Reference</b>    |
|------------------------------------------------------|-----------------|------------------|----------------|---------------------|
| ([Co <sub>1.5</sub> (tib)(dcpna)]·6H <sub>2</sub> O) | 13.4            | 247.0            | 118            | 6                   |
| Co <sub>3</sub> O <sub>4</sub>                       | 14.1            | 408.6            | 0.56           |                     |
| CoSe <sub>4</sub>                                    | No data         | 180              | No data        | 8                   |
| <b>Complex (1)</b>                                   | <b>48.37</b>    | <b>174.09</b>    | <b>No data</b> | <b>Present work</b> |
| <b>Complex (2)</b>                                   | <b>39.6</b>     | <b>265.28</b>    | <b>No data</b> |                     |

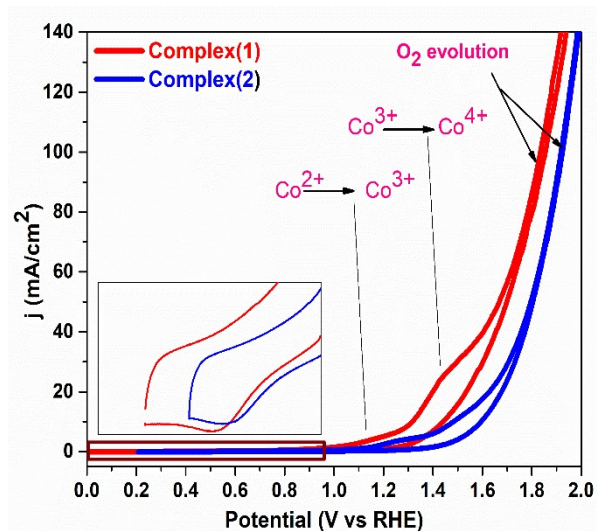

(a)

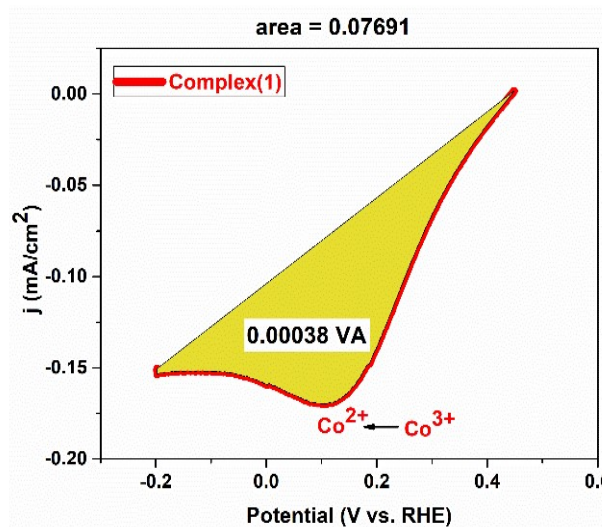

(b)

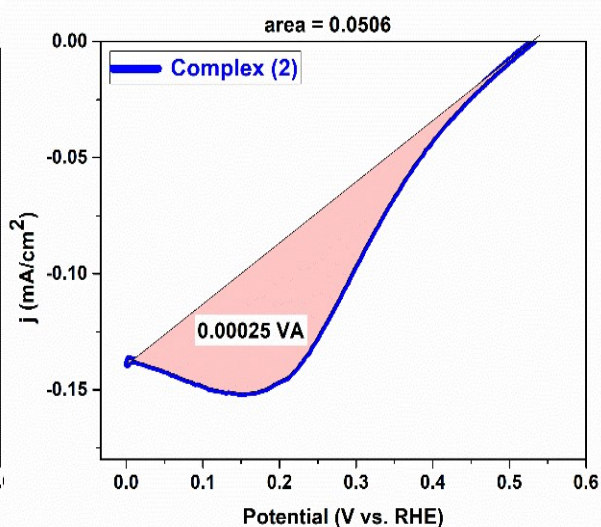

(c)

**Fig. S12** (a) CV curves of Cobalt acylpyrazolone complex (1) and (2), (b) Calculated area of complex 1 and (c) Calculated area of complex 2 with reduction of Co<sup>3+</sup> to Co<sup>2+</sup>.



## Determination of active sites from the redox curves

|                                        |                                                                        |                                                                   |
|----------------------------------------|------------------------------------------------------------------------|-------------------------------------------------------------------|
|                                        |                                                                        | - Co                                                              |
| Calculated area                        | = 0.077 mVA<br>= 0.000077 VA                                           | <b>Complex (1)</b>                                                |
| Scan rate                              | 200 mV/s = 0.2 V/s                                                     |                                                                   |
| The associated charge is               | = 0.000077 VA / 0.2 Vs <sup>-1</sup><br>= 0.00038 As<br>= 0.00038 C    | Since, the oxidation of Co <sup>2+</sup> to Co <sup>3+</sup> is a |
| The number of electrons transferred is | = 0.00038 C / 1.602 × 10 <sup>-19</sup> C<br>= 2.40 × 10 <sup>15</sup> | single electron transfer reaction,                                |

### - Complex 2

|                                        |                                                                        |  |
|----------------------------------------|------------------------------------------------------------------------|--|
| Calculated area                        | = 0.0506 mVA<br>= 0.0000506 VA                                         |  |
| Scan rate                              | 200 mV/s = 0.2 V/s                                                     |  |
| The associated charge is               | = 0.0000506 VA / 0.2 Vs <sup>-1</sup><br>= 0.00025 As<br>= 0.00025 C   |  |
| The number of electrons transferred is | = 0.00025 C / 1.602 × 10 <sup>-19</sup> C<br>= 1.56 × 10 <sup>15</sup> |  |

the number electron calculated above is exactly the same as the number of surface-active sites. Hence, the surface concentration of Co atom participated in OER is **2.40 × 10<sup>15</sup>** and **1.56 × 10<sup>15</sup>** for complex (1) and (2) respectively.

### Determination of Turnover Frequency (TOF) from OER overpotentials

TOF was calculated by calibrating the surface-active Co atoms that undergone redox reaction before onset of OER only participated in OER electrocatalysis.

Therefore, TOF can be calculated by,

$$\text{TOF} = j \times \text{NA} / F \times n \times \Gamma \dots\dots\dots (S1)$$

Where,

$j$  = current density

NA= Avogadro number

F = Faraday constant

$n$  = Number of electrons

$\Gamma$  = Surface concentration

#### For Complex (1)

$$\text{TOF}_{1.52\text{V}} = [(40.70 \times 10^{-3}) (6.023 \times 10^{23})] / [(96485) (4) (0.240 \times 10^{16})]$$

**TOF<sub>1.61V</sub> = 26.46 s<sup>-1</sup>**

#### For Complex (2)

$$\text{TOF}_{1.52\text{V}} = [(18.30 \times 10^{-3}) (6.023 \times 10^{23})] / [(96485) (4) (0.156 \times 10^{16})]$$

**TOF<sub>1.61V</sub> = 18.30 s<sup>-1</sup>**

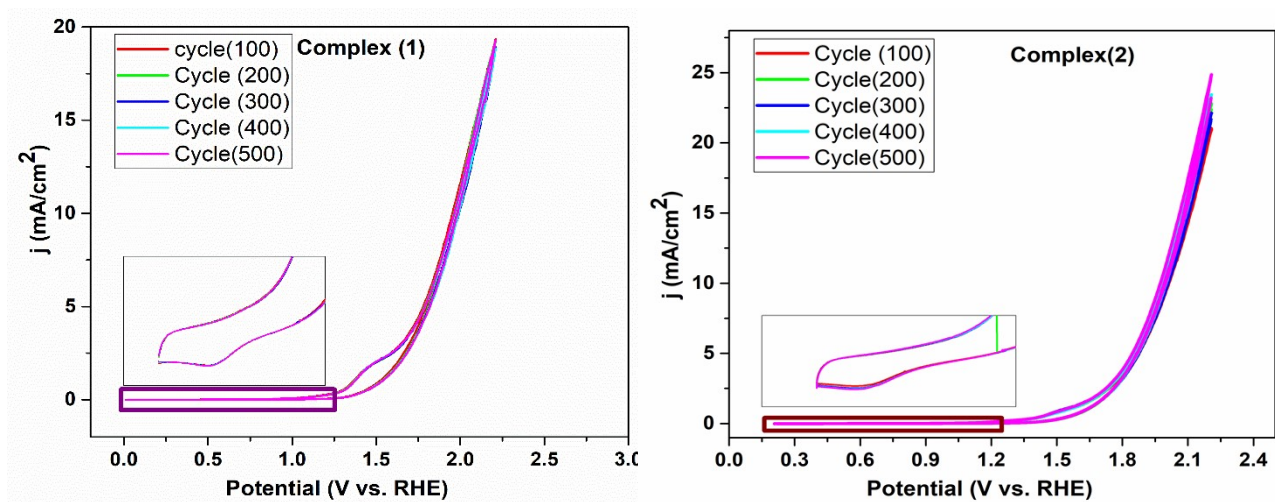

Fig. S13 Selected cycle CV curve of Complex (1) and (2) taken at a scan rate of 200 mV/se

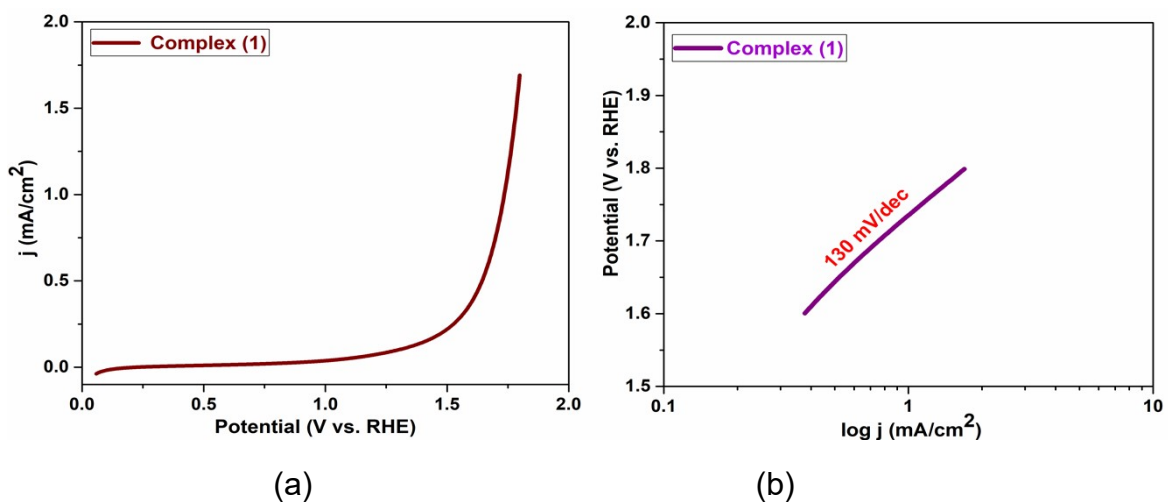

Fig. S14 LSV curve at a scan rate of 50 mV/s, (b) Tafel slope at overpotential of 597 mV of cobalt-acylpyrazolone complexes (1) in 0.5 M Na<sub>2</sub>SO<sub>4</sub>

**Table. S10** Comparison of cobalt complexes towards HER with literature reported

Cobalt based electrocatalysts in 1M KOH

| Compounds                                  | Current density (mA/cm <sup>2</sup> ) | Over potential (mV) | Tafel slope(mV/dec) | reference           |
|--------------------------------------------|---------------------------------------|---------------------|---------------------|---------------------|
| CoP@PC-750                                 | 10                                    | 85mv                | -----               |                     |
| Co-NCNTs                                   | 2<br>10                               | 104<br>170          | 97                  | 15                  |
| Co-Phosphine                               | 2<br>10                               | 65<br>110           | 93                  | 16                  |
| Co-NRCNTs(N- riche doped carbon nanotubes) | 2<br>10                               | 380<br>540          | No data             | 17                  |
| Co(BFAC)CNT S                              | 0.8 mA/cm <sup>-2</sup>               | 800                 | No data             | 18                  |
| <b>Complex (2)</b>                         | <b>2</b>                              | <b>573</b>          | <b>129</b>          | <b>Present work</b> |

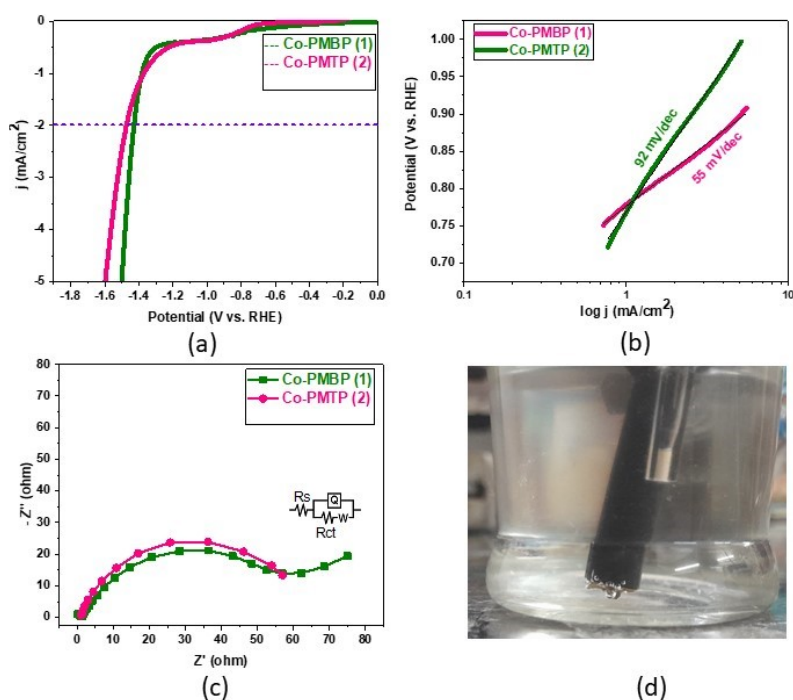**Fig. S15** (a) LSV curves at a scan rate of 50 mV/s, (b) Tafel slope and (c) EIS spectra of complex (1) and

(2)/GC in neutral condition; (d) H<sub>2</sub> bubbles on the electrode of Cobalt-pyrazolone complex (2)/GC

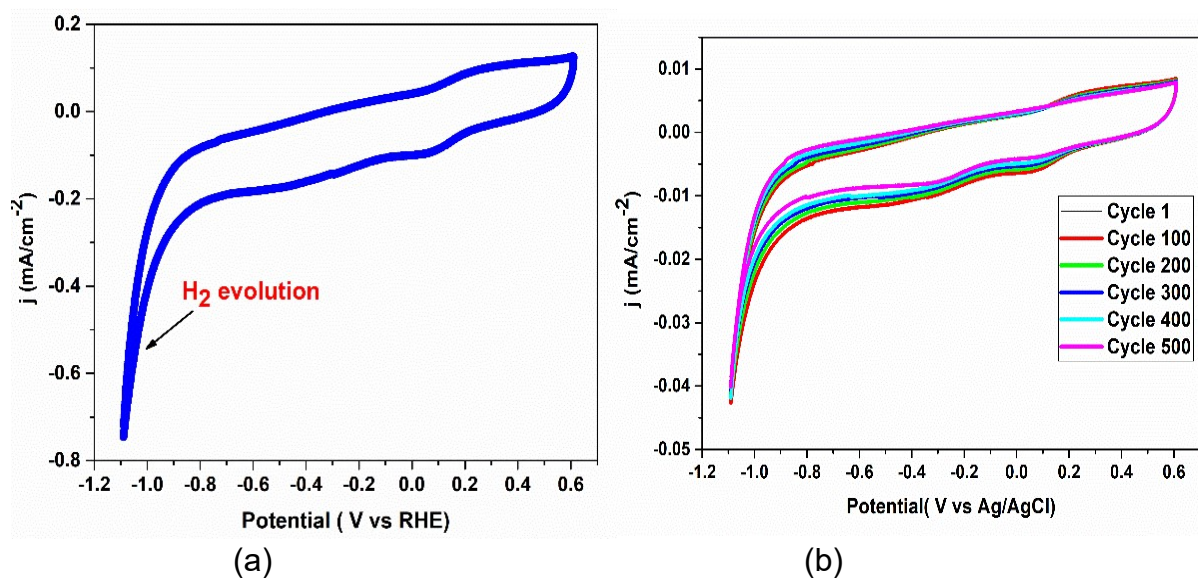

**Fig. S16** (a) CV curves and (b) Selected cycle CV curve of complex (1) taken at a scan rate of 200 mV/sec.

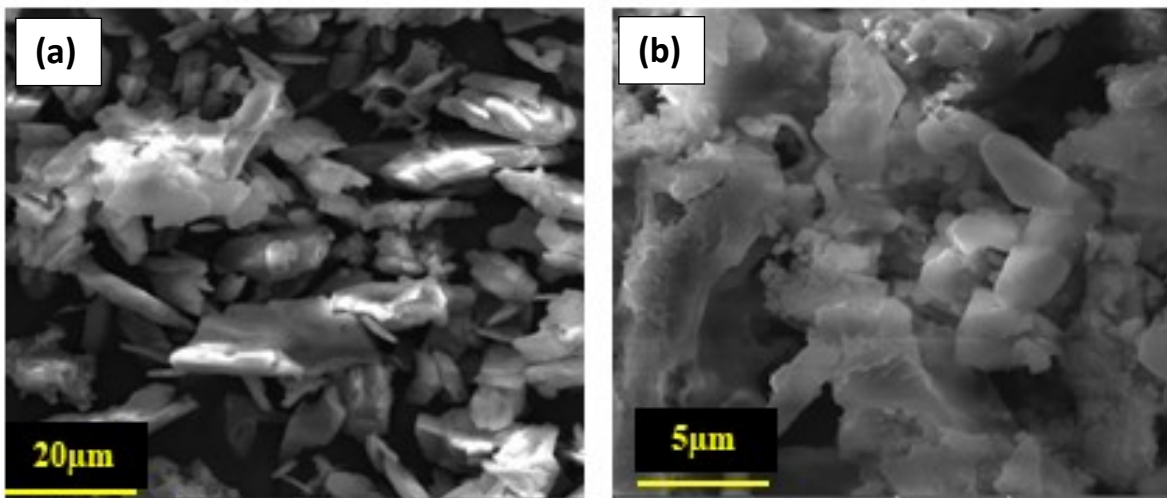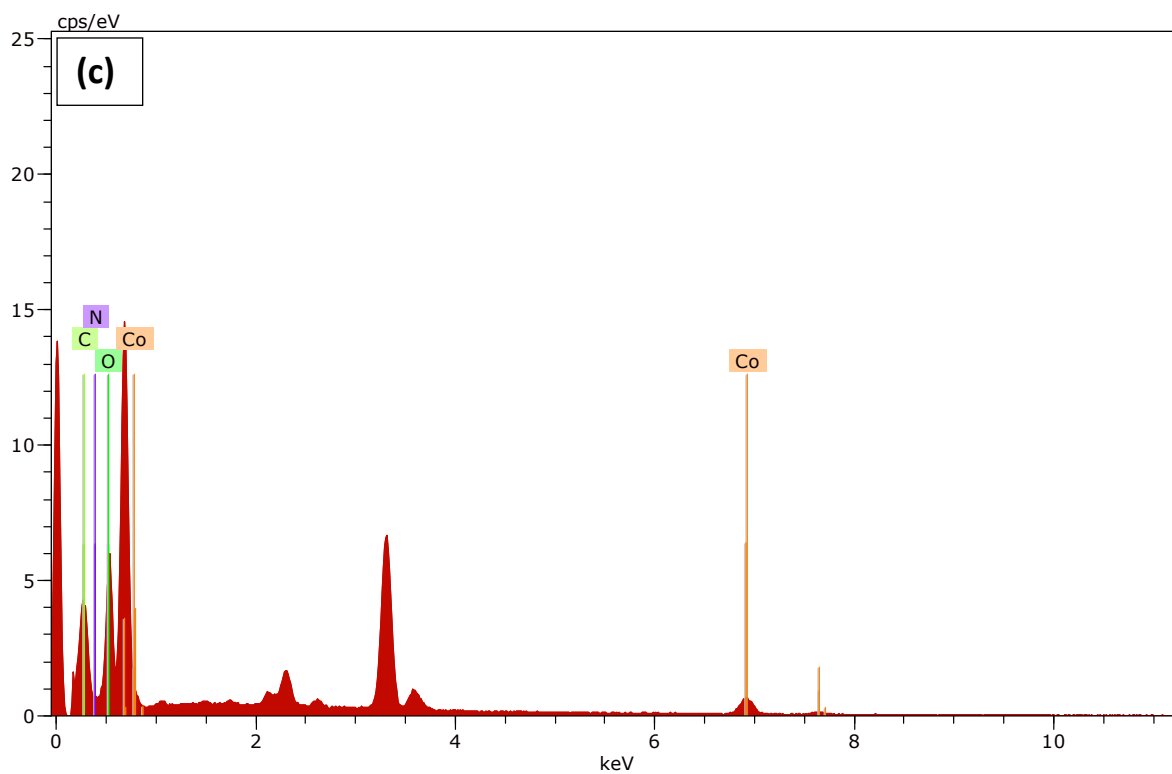

**Fig. S17** (a), (b) SEM images and corresponding (c) EDAX spectra of complex (2) after continuous electrolysis at 1.6 V vs RHE.

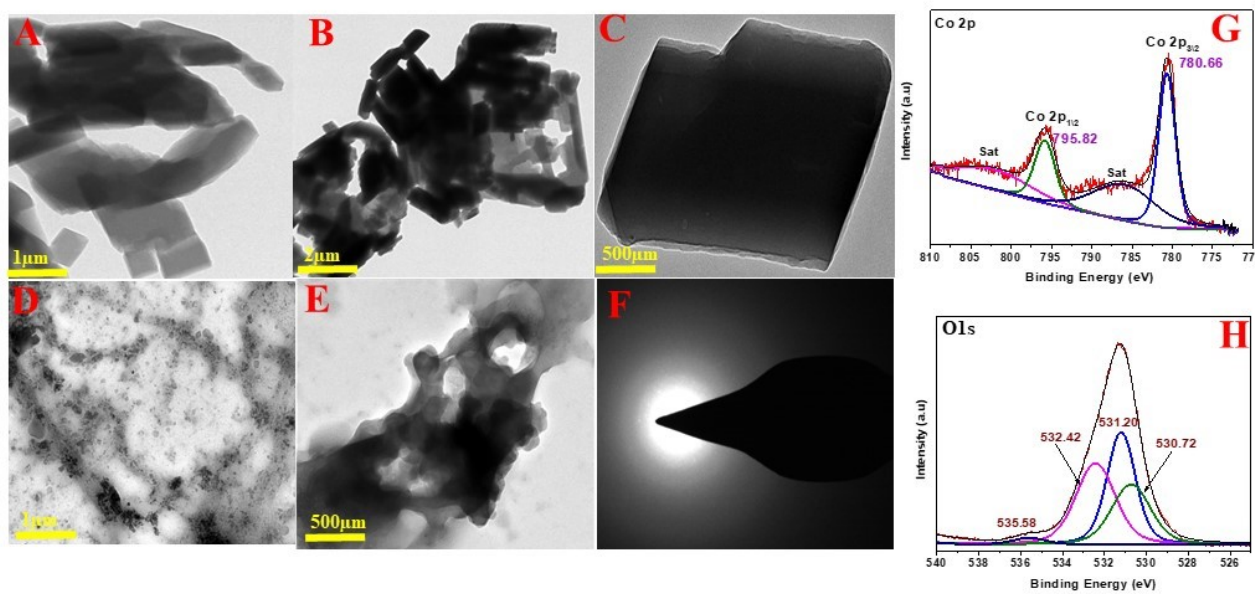

**Fig. S18** (A–C) before and (D–E) Post-OER HR-TEM images of complex (2), (F) the corresponding SAED patterns of the post-OER sample and (G–H) High resolution spectra of Co2p and O1s for the post-OER of complex (2)

### DFT Studies

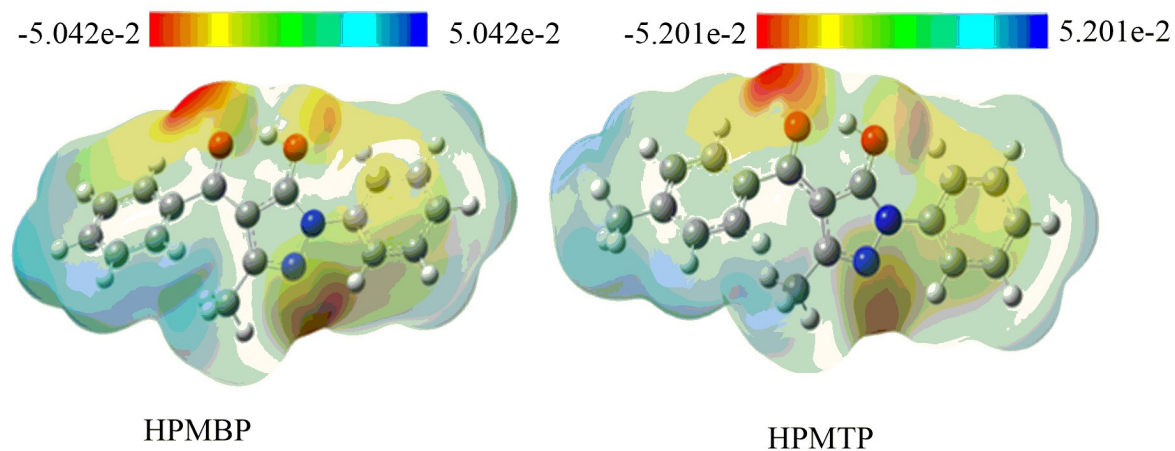

**Fig. S19** Molecular electrostatic potential of acylpyrazolone ligands

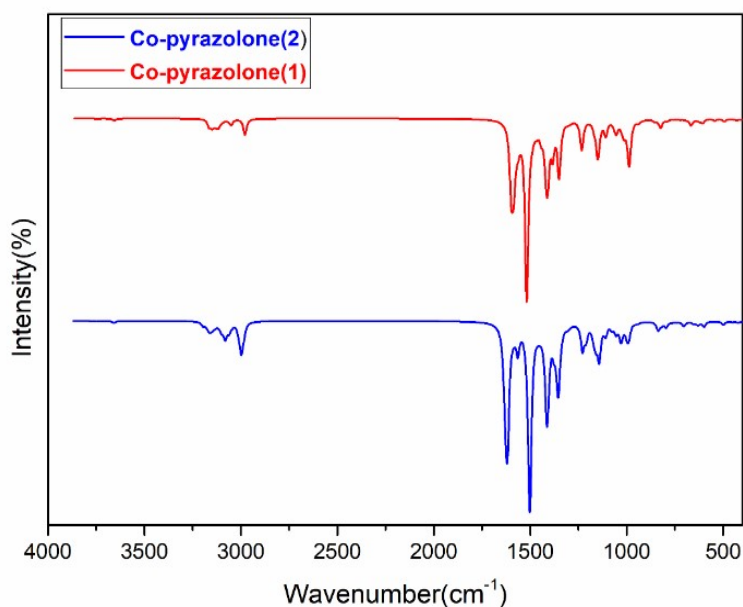

**Fig. S20.** Theoretical FT-IR spectra of cobalt-acylpyrazolone complexes

**Table. S11** Occupancy of energy orbitals of Co(II) ions in complex (1) and (2)

|         |                  | <b>Complex (1)</b> | <b>Complex (2)</b> |                  |       |
|---------|------------------|--------------------|--------------------|------------------|-------|
|         | <b>Occupancy</b> | <b>Energy (eV)</b> | <b>Energy (eV)</b> | <b>orbitales</b> |       |
| n=1 l=0 | 2.00             | -7515.3151         | -7515.5740         | s                |       |
| n=2 l=0 | 2.00             | -882.3445          | -882.5902          |                  |       |
| n=2 l=1 | 6.00             | -765.9584          | -766.2053          | p                | HOMOs |
| n=3 l=0 | 2.00             | -99.2845           | -99.5351           | s                |       |
| n=3 l=1 | 6.00             | -64.4929           | -64.7435           | p                |       |
| n=3 l=2 | 7.00             | -7.9180            | -8.1606            | d                |       |
| n=4 l=0 | 2.00             | -4.7864            | -5.0375            | s                |       |
| n=3 l=2 | 0.00             | -35.9794           | -35.9801           | d                | LUMOs |
| n=4 l=0 | 0.00             | -20.6063           | -20.6280           | P                |       |
| n=4 l=1 | 0.00             | -14.4467           | -14.5301           | S                |       |
| n=4 l=1 | 0.00             | -6.9885            | -7.2110            | P                |       |



## References

1. E. C.A. Okafor, *Spectrochim Acta.*, 1984, **40A**, 5 397-401.
2. M. Fabio, R. Pettinari and C. Pettinari, *Coord. Chem. Rev.*, 2015. **303**, 1-31.
3. M. Fabio, J. Palmucci, C. Pettinari, R. Pettinari, S. Scuri, I. Grappasonni, M. Cocchioni, M. Amati, F. Lelj and A. Crispini, *Inorg. Chem.*, 2016, **55(11)**, 5453–5466.
4. S. Parihar, S. Pathan, R. N. Jadeja, A. Patel and V. K. Gupta, *Inorg. Chem.* 2011. **51**, 1152–1161.
5. M. Atanassova, V. Kurteva, L. Lubenov, S. Varbanov and I. Dukov, *Sep. Puri. Technol.*, 2012, **95**, 58–63.
6. M. A. Ibrahim, M. Jahangir, C. I. Polydoros and F. Eleftherios, *Molecules*. 2021, **26**, 945.
7. S. Zohreh, S. K. Parya and M. R. Rahim, *Appl. Organomet. Chem.*, 2021, **35(3)**, 1-15
8. M. Qingguo, Y. Jianjian, M. Shixuan, Z. Mujun and L. Jitao, *Polymers.*, 2017, **9**, 676.
9. M. S. Burke, M. G. Kast, L. Trotochaud, A. M. Smith and S. W. Boettcher, *J. Am. Chem. Soc.*, 2015, **137**, 3638-3648.
10. X. Zhicai, L. Qian, X. Wei, M. A. Abdullah, S. Xuping, *Chem. Sus. Chem.*, 2015, **8(11)**, 1850–1855.
11. T. Jingqi, L. Qian, M. A. Abdullah and S. Xuping, *J. Am. Chem. Soc.*, 2014, **136**, 7587–7590.
12. Z. Xiaoxin, H. Xiaoxi, G. Anandarup, S. Rafael, R. S. Bhaskar, M. Elis`ka, and A. Tewodros, *Angew. Chem.*, 2014, **126**, 4461–4465.
13. C. Ye, L. Zhang, L. Yue, B. Deng, Y. Cao, Q. Liu, Y. Luo, S. Lu, B. Zheng and X. Sun, *Inorg. Chem. Front.*, 2021, **8**, 3162–3166
14. C. Meng, Y. Cao, Y. Luo, F. Zhang, Q. Kong, A. A. Alshehri, K. A. Alzahrani, T. Li, Q. Liu and X. Sun, *Inorg. Chem. Front.*, 2021, **8**, 3007–3011
15. L. Xialiang, L. Haitao, L. Jieyu, Z. Xueli, D. Shuping, Z. Zongyao, T. Xixi, Z. Wei, W. Weichao and Z. Xiaohong, *Angew. Chem. Int. Ed.* 2018, **57**, 15070–15075.
16. H. Binbin, W. Yan, Z. Shuzhong and Y. Jianshan, *Appl. Surf. Sci.*, 2017, **396**, 121–128.
17. S. Hua-Tian, L. Xiu-Xiu, W. Fang-Hui and Y. Wei-Bin, *Dalt. Trans.*, 2017, **46**, 16321-16326.
18. W. Jiadong, W. Depeng, W. Shuao, L. Huiling, W. Cheng and W. Xun, *Small.*, 2020, **16**, 1900550
